# Supplementary material
Source: PubMed Central journal article supplement (PMC9246872)
Supplement: NIHMS1800021-supplement-Appendix_Supplemental_digital_content.pdf [file NIHMS1800021-supplement-Appendix_Supplemental_digital_content.pdf]

**Appendix 1. Salt Questionnaire for Thessaloniki Eye Study Incidence Phase Participants**

|                                                                                                                                                          |
|----------------------------------------------------------------------------------------------------------------------------------------------------------|
| 1. What type of salt do you add to your food at the table?<br>a. Ordinary, seasoned, or flavored salt<br>b. Light salt<br>c. Salt substitute<br>d. Other |
| 2. How often do you use salt to flavor your food at the table?<br>a. Never<br>b. Rarely<br>c. Occasionally<br>d. Often                                   |
| 3. How often do you use salt to flavor your food while cooking or preparing food?<br>a. Never<br>b. Rarely<br>c. Occasionally<br>d. Often                |
| 4. Do you use salt tablets?<br>a. Yes<br>b. No                                                                                                           |
